# Supplementary material
Source: PubMed Central journal article supplement (PMC4030803)
Supplement: cn500016p_si_001.pdf [file cn500016p_si_001.pdf]

## Supporting Information.

### Acetylcholinesterase Inhibitors with Photoswitchable

### Inhibition of $\beta$ -Amyloid-Aggregation

*Xinyu Chen<sup>†,‡</sup>, Sarah Wehle<sup>‡</sup>, Natascha Kuzmanovic<sup>§</sup>, Benjamin Merget<sup>‡</sup>,*

*Ulrike Holzgrabe<sup>‡</sup>, Burkhard König<sup>§</sup>, Christoph A. Sotriffer<sup>‡</sup>, Michael Decker<sup>†,‡</sup> \**

<sup>†</sup>Institut für Pharmazie, <sup>§</sup>Institut für Organische Chemie, Universität Regensburg,  
Universitätsstraße 31, 93053 Regensburg, Germany, <sup>‡</sup>Institut für Pharmazie und  
Lebensmittelchemie, Julius-Maximilians-Universität Würzburg, Am Hubland, 97074  
Würzburg, Germany

### Table of Contents:

- ❖ Spectral data of target compounds
- ❖ HPLC chromatography for compound **11b**
- ❖ Supplementary figures for pharmacological testings
- ❖ Supplementary figures for computational studies

## Spectral data of target compounds

**10a:**

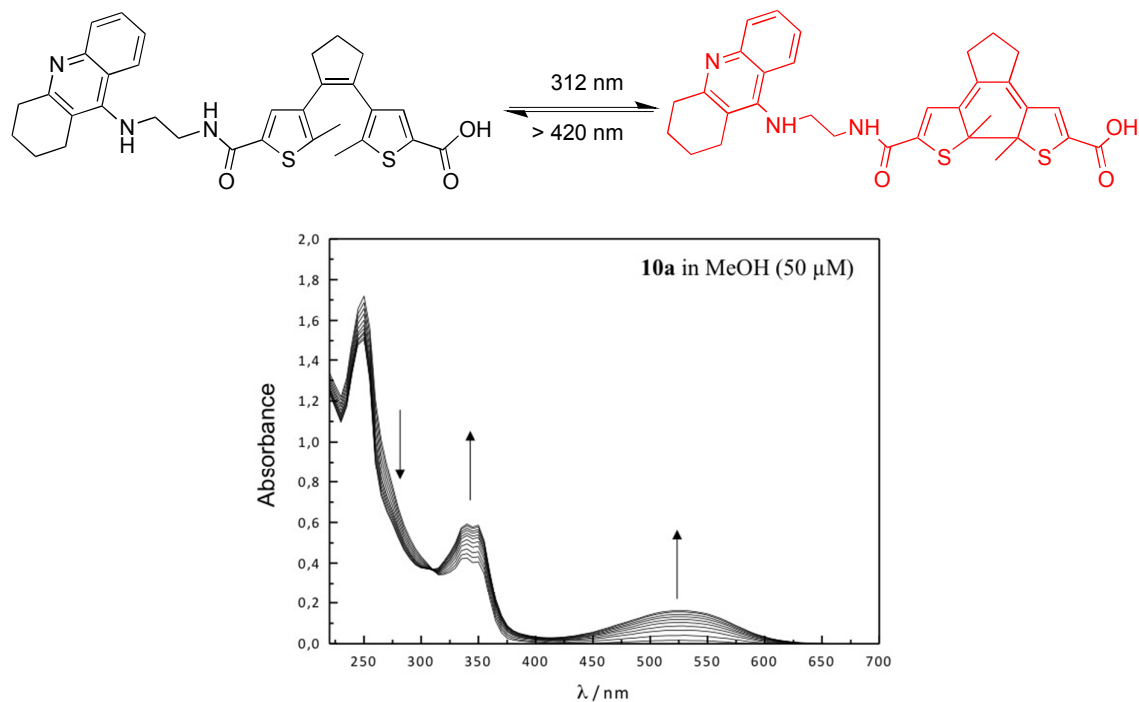

**Figure 1.** UV-Vis absorption spectra evolution of compound **10a** dissolved in methanol (50 μM) by irradiation with 312 nm light. Arrows indicate the changes of the absorption maxima with irradiation periods of 6 s.

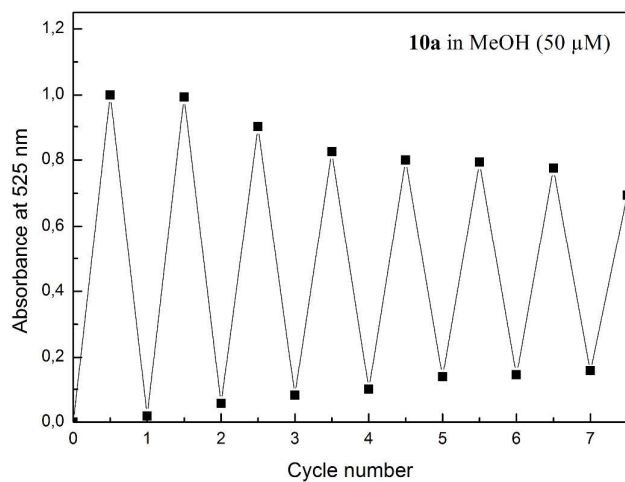

**Figure 2.** Cycle performance of compound **10a**, changes in absorption at 525 nm during an alternated irradiation of a solution in MeOH (50 μM) with 312 nm light for 60 s and greater than 420 nm light for 15 min.

**10b:**

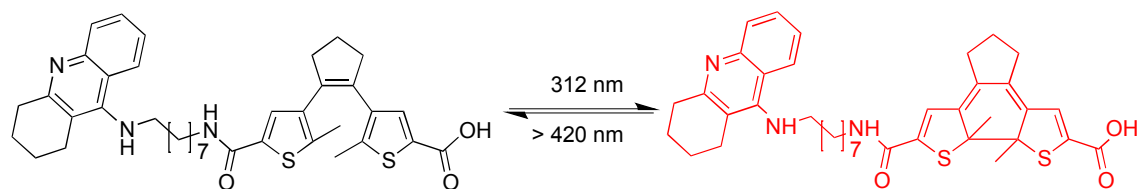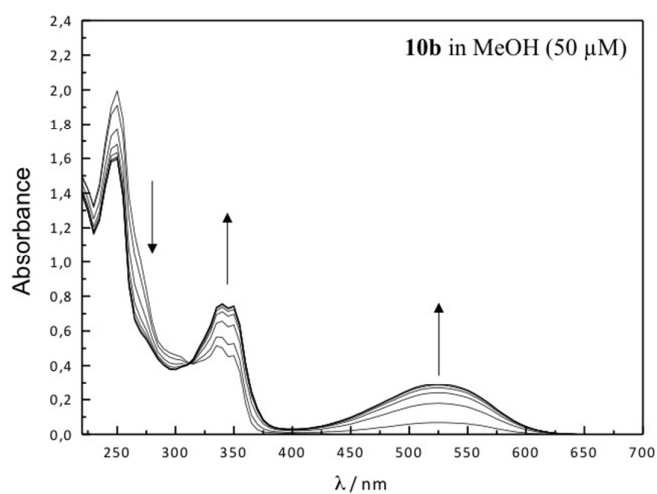

**Figure 3.** UV-Vis absorption spectra evolution of compound **10b** dissolved in methanol (50  $\mu\text{M}$ ) by irradiation with 312 nm light. Arrows indicate the changes of the absorption maxima with irradiation periods of 6 s.

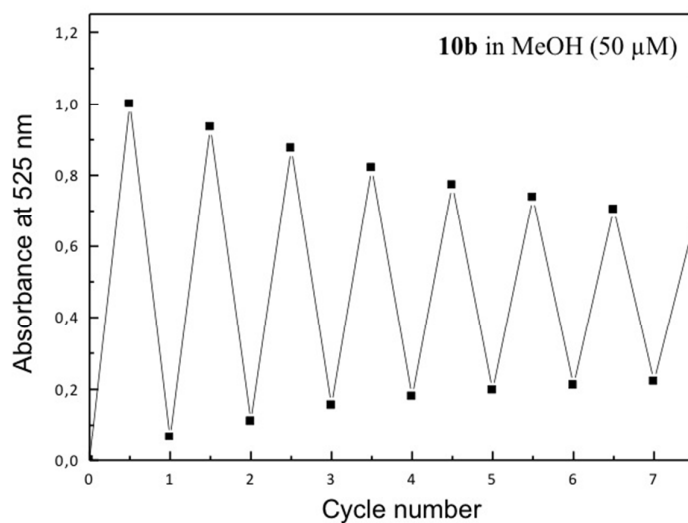

**Figure 4.** Cycle performance of compound **10b**, changes in absorption at 525 nm during an alternated irradiation of a solution in MeOH (50  $\mu\text{M}$ ) with 312 nm light for 60 s and greater than 420 nm light for 15 min.

**11a:**

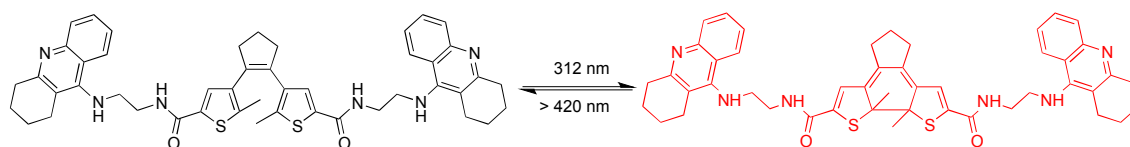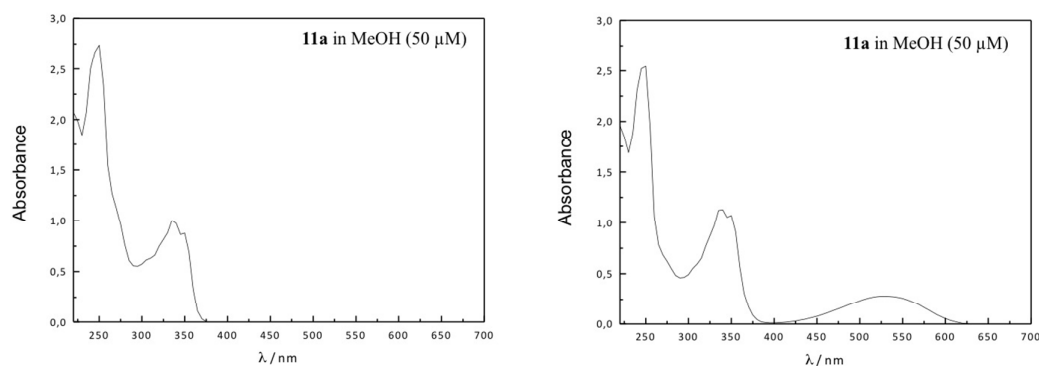

**Figure 5.** Absorption spectra of **11a** in its ring-opened photoisomer (**11a open**, left) and its ring-closed one (**11a-close**, right).

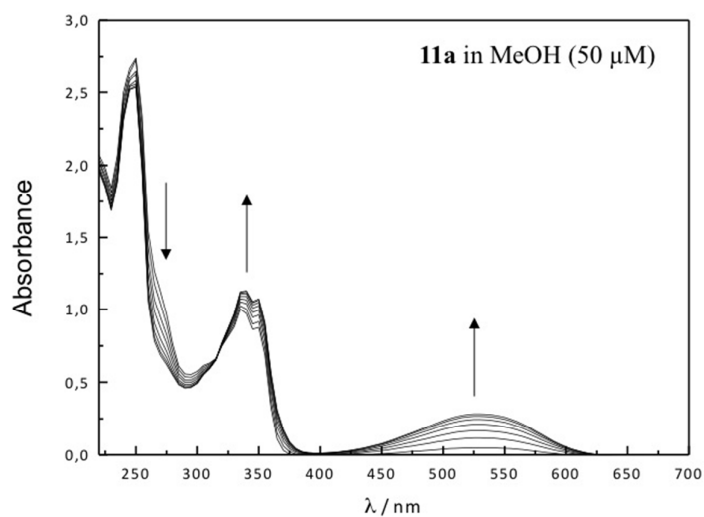

**Figure 6.** UV-Vis absorption spectra evolution of compound **11a** dissolved in methanol (50 μM) by irradiation with 312 nm light. Arrows indicate the changes of the absorption maxima with irradiation periods of 6 s.

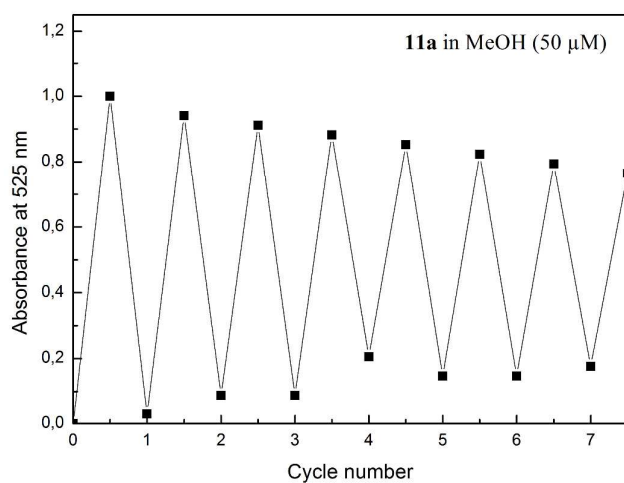

**Figure 7.** Cycle performance of compound **11a**, changes in absorption at 260 nm (black) and 540 nm (blue) during an alternated irradiation of a solution in methanol (50 μM) with 312 nm light for 60 s and greater than 420 nm light for 15 min.

The photostationary state of the ring-closed photoisomer in a methanol solution (50  $\mu\text{M}$ ) was reached after 30 s of irradiation with 312 nm light as shown in the HPLC-chromatograms in Error! Reference source not found.8 and 9. We performed the studies exemplarily with compound **11b** by analytical HPLC-MS detecting absorption at 525 nm.

Since all samples for the ChEs inhibition assay were used in concentrations lower than 50  $\mu\text{M}$ , the conversion to the ring-closed photoisomers was assumed to be quantitative after 15 min of UV irradiation and the results achieved for the ring-closed photoisomers were reliable and totally dependent on the activities of the ring-closed form.

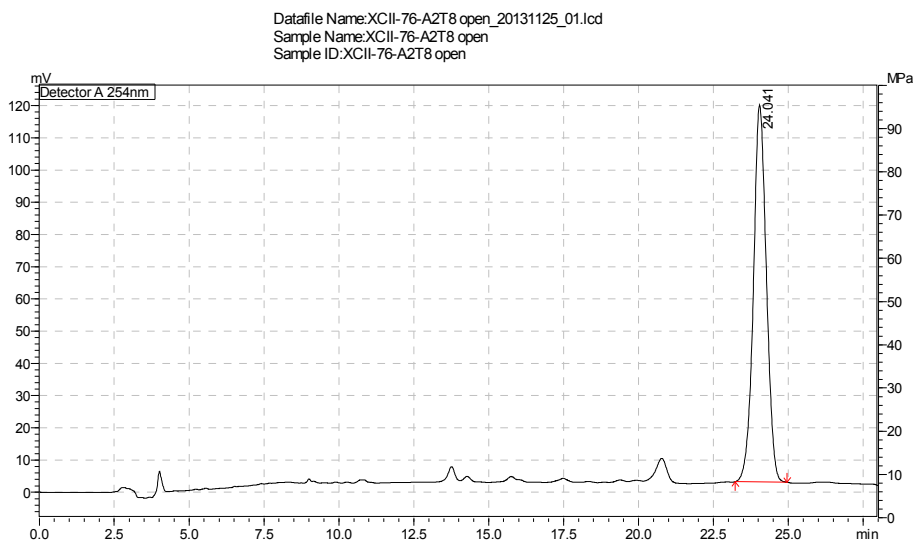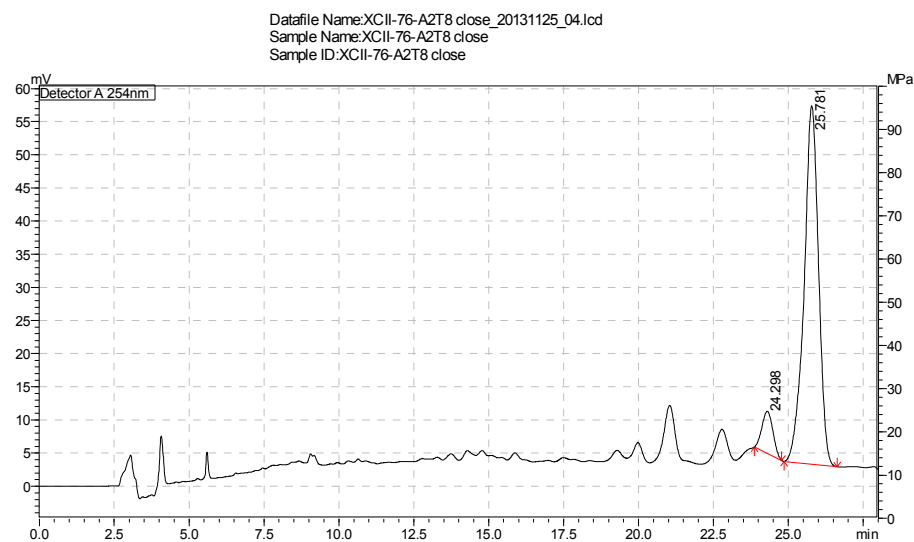

**Figure 8.** The HPLC chromatography of both ring-opened (above) and ring-closed (below) forms (10  $\mu$ M in buffer solution, pH = 8.0).

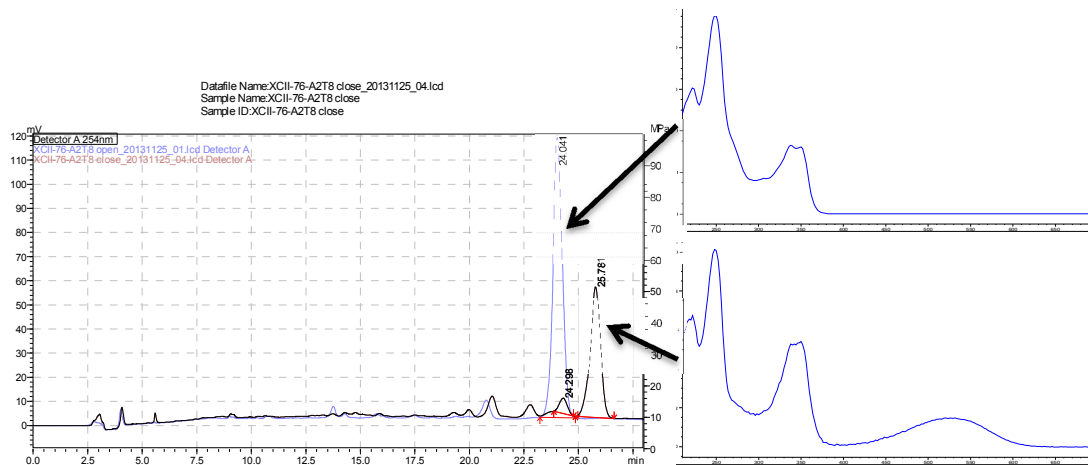

**Figure 9.** Overlap of chromatograms of both photochromic forms on HPLC (100  $\mu$ M in buffer solution, pH = 8.0): Ring-opened (blue line) and -closed (dark red) forms with respective UV-Vis absorbance. The chromatogram of ring-closed form was irradiated for 30 s indicate that 92% of the open isomer was converted to the closed one (absorption at 525 nm). HPLC: Shimadzu, 150\*4.6 mm Phenomenex C18 column, A) Millipore water + 0.1% TFA, B) Acetonitrile + 0.2% TFA, 1mL/min flow rate, from 30% to 55% for 5 min, remain 20 min and drop to 30% in 3 min.

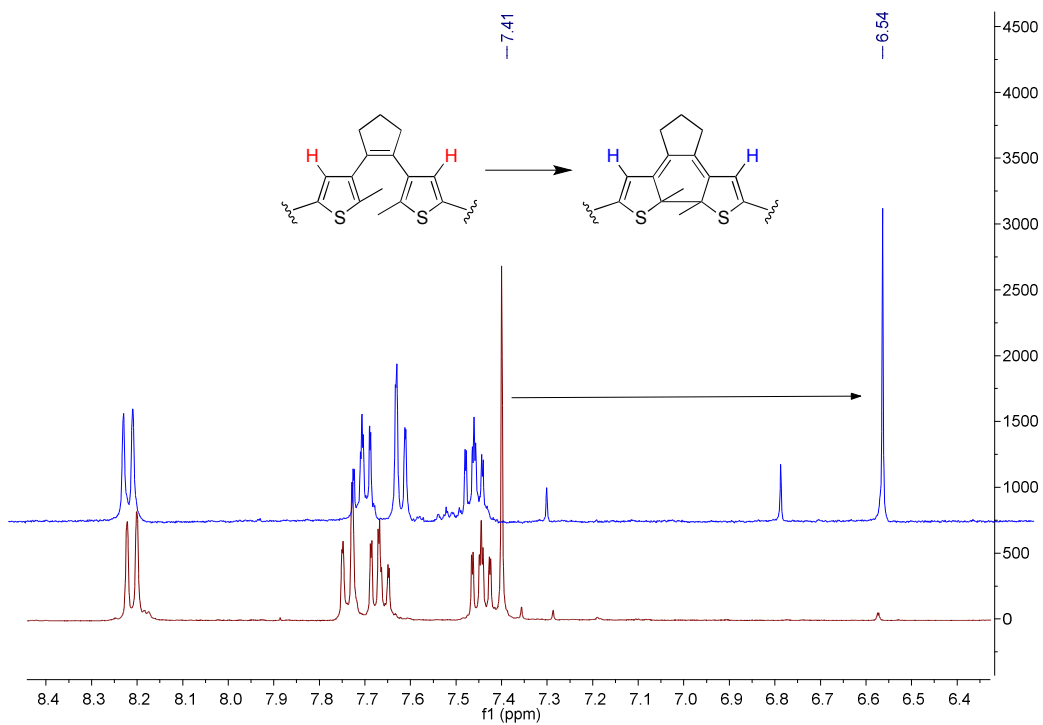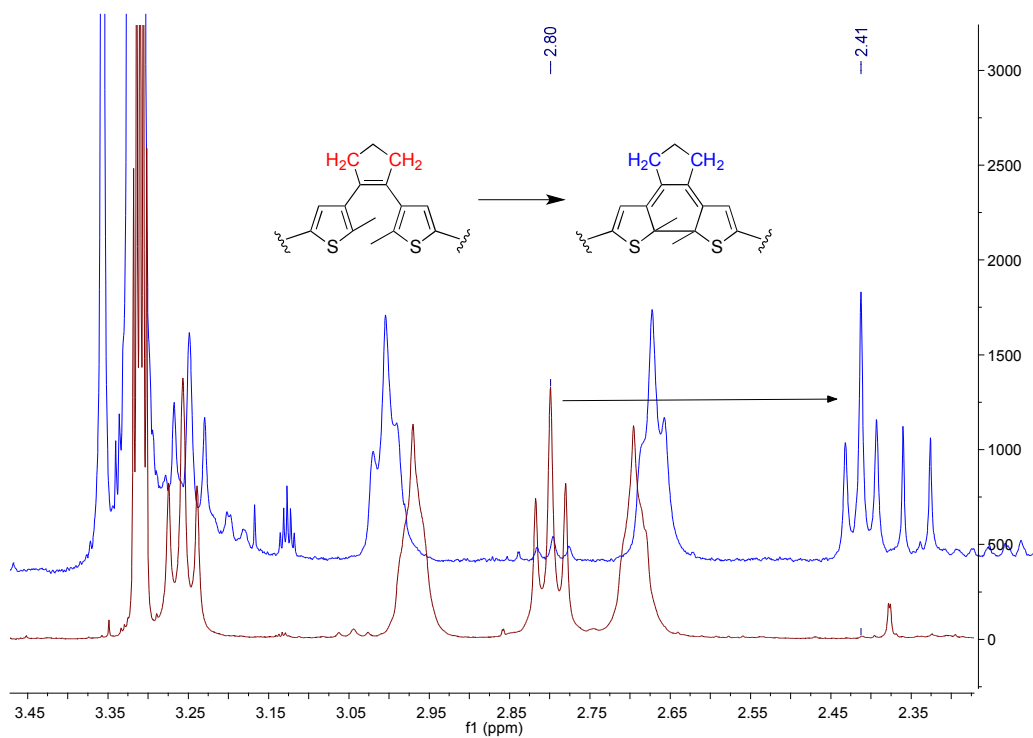

**Figure 10.** The chemical shift changing from ring-opened form (red) to ring-closed form (blue) at both aromatic area (above) and aliphatic area (below).



11b at eAChE  
X. Chen 12/11/2013

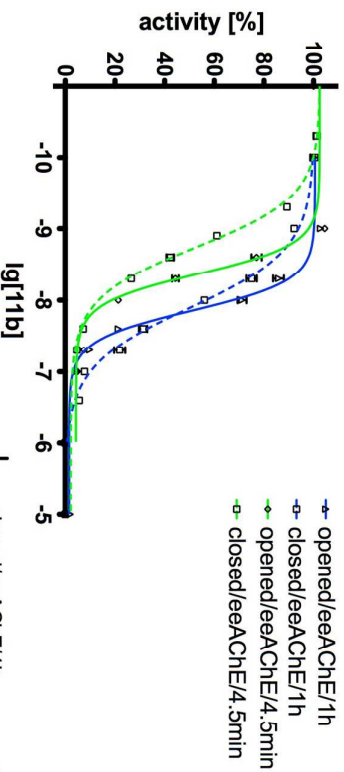

|                                          | closed/eeAChE/1h         | opened/eeAChE/1h         | opened/eeAChE/4.5min     | closed/eeAChE/4.5min     |
|------------------------------------------|--------------------------|--------------------------|--------------------------|--------------------------|
| Sigmoidal dose-response (variable slope) |                          |                          |                          |                          |
| Best-fit values                          |                          |                          |                          |                          |
| Bottom                                   | -0.2672                  | 1.555                    | 4.283                    | 2.179                    |
| Top                                      | 100.2                    | 100.6                    | 102.5                    | 102.6                    |
| LogEC50                                  | -7.889                   | -7.854                   | -8.365                   | -8.735                   |
| HillSlope                                | -1.057                   | -2.077                   | -2.087                   | -1.225                   |
| EC50                                     | 1.291e-008               | 1.400e-008               | 4.317e-009               | 1.842e-009               |
| Std. Error                               |                          |                          |                          |                          |
| Bottom                                   | 1.485                    | 1.129                    | 1.250                    | 1.094                    |
| Top                                      | 1.511                    | 1.254                    | 1.373                    | 1.189                    |
| LogEC50                                  | 0.02555                  | 0.01621                  | 0.01701                  | 0.01939                  |
| HillSlope                                | 0.06228                  | 0.1233                   | 0.1535                   | 0.06626                  |
| 95% Confidence Intervals                 |                          |                          |                          |                          |
| Bottom                                   | -3.340 to 2.805          | -0.7859 to 3.896         | 1.697 to 6.870           | -0.08528 to 4.444        |
| Top                                      | 97.11 to 103.4           | 97.99 to 103.2           | 99.62 to 105.3           | 100.2 to 105.1           |
| LogEC50                                  | -7.942 to -7.836         | -7.887 to -7.820         | -8.400 to -8.330         | -8.775 to -8.695         |
| HillSlope                                | -1.185 to -0.9278        | -2.333 to -1.822         | -2.405 to -1.770         | -1.363 to -1.088         |
| EC50                                     | 1.143e-008 to 1.458e-008 | 1.296e-008 to 1.513e-008 | 3.981e-009 to 4.682e-009 | 1.679e-009 to 2.020e-009 |
| Goodness of Fit                          |                          |                          |                          |                          |
| Degrees of Freedom                       | 23                       | 22                       | 23                       | 23                       |
| R square                                 | 0.9949                   | 0.9954                   | 0.9935                   | 0.9953                   |
| Absolute Sum of Squares                  | 185.2                    | 212.5                    | 312.3                    | 174.9                    |
| Sy.x                                     | 2.838                    | 3.108                    | 3.685                    | 2.758                    |
| Number of points                         |                          |                          |                          |                          |
| Analyzed                                 | 27                       | 26                       | 27                       | 27                       |

11b at hACHE  
X. Chen 12/11/2013

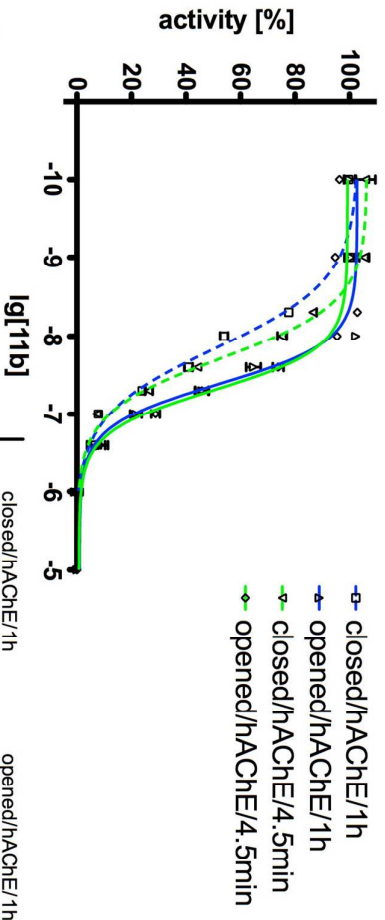

| Best-fit Values           | closed/hACHE/1h          | opened/hACHE/1h          | closed/hACHE/4.5min      | opened/hACHE/4.5min      |
|---------------------------|--------------------------|--------------------------|--------------------------|--------------------------|
| Bottom                    | -0.8405                  | 0.9872                   | -0.1054                  | 0.7888                   |
| Top                       | 103.2                    | 102.8                    | 106.4                    | 99.26                    |
| LogEC50                   | -7.849                   | -7.383                   | -7.718                   | -7.305                   |
| HillSlope                 | -1.001                   | -1.603                   | -1.242                   | -1.617                   |
| EC50                      | 1.417e-008               | 4.142e-008               | 1.914e-008               | 4.956e-008               |
| Std. Error                |                          |                          |                          |                          |
| Bottom                    | 2.324                    | 2.046                    | 2.058                    | 1.770                    |
| Top                       | 2.238                    | 2.088                    | 1.887                    | 1.481                    |
| LogEC50                   | 0.03816                  | 0.02937                  | 0.02992                  | 0.02370                  |
| HillSlope                 | 0.08408                  | 0.1568                   | 0.09224                  | 0.1374                   |
| 95% Confidence Intervals  |                          |                          |                          |                          |
| Bottom                    | -5.649 to 3.968          | -3.247 to 5.221          | -4.363 to 4.152          | -2.873 to 4.451          |
| Top                       | 98.53 to 107.8           | 98.48 to 107.1           | 102.5 to 110.3           | 96.20 to 102.3           |
| LogEC50                   | -7.928 to -7.770         | -7.444 to -7.322         | -7.780 to -7.656         | -7.354 to -7.256         |
| HillSlope                 | -1.175 to -0.8272        | -1.928 to -1.279         | -1.432 to -1.051         | -1.901 to -1.332         |
| EC50                      | 1.182e-008 to 1.700e-008 | 3.601e-008 to 4.764e-008 | 1.660e-008 to 2.207e-008 | 4.427e-008 to 5.548e-008 |
| Goodness of Fit           |                          |                          |                          |                          |
| Degrees of Freedom        | 23                       | 23                       | 23                       | 23                       |
| R square                  | 0.9896                   | 0.9864                   | 0.9913                   | 0.9904                   |
| Absolute Sum of Squares   | 390.3                    | 637.9                    | 389.6                    | 405.5                    |
| Sy.x                      | 4.119                    | 5.267                    | 4.116                    | 4.199                    |
| Number of points Analyzed | 27                       | 27                       | 27                       | 27                       |

**Figure 11.** Inhibition curves of **11b** at *eeAChE* and *hAChE* as both ring-opened and -closed forms.

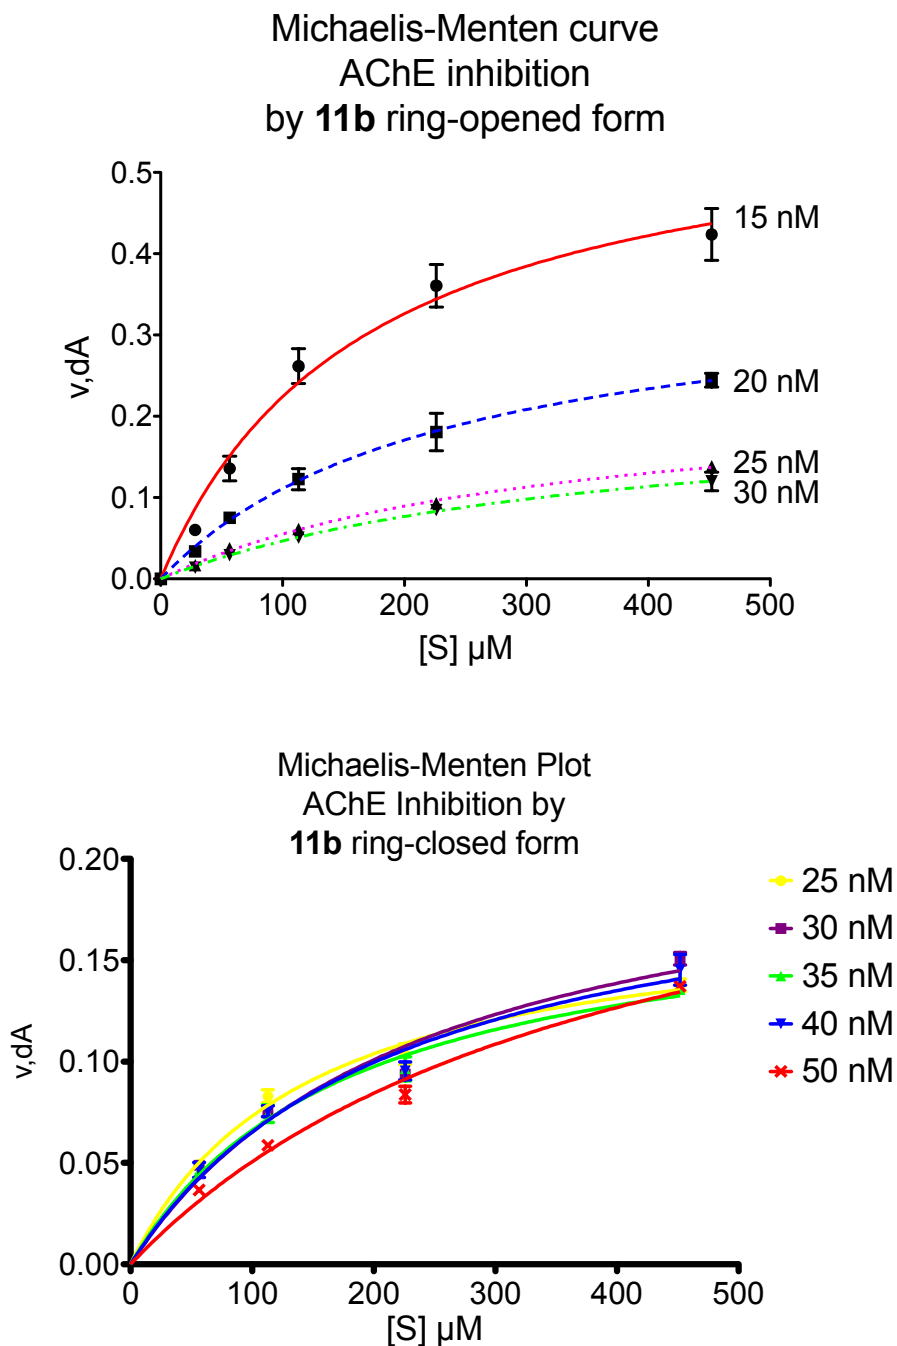

**Figure 12.** Substrate-velocity curves (Michaelis-Menten) of *eeAChE* activity with different substrate concentration (28.2-452 μM) in the presence of 15-30 nM compound **11b** in its ring-opened form and 25-50 nM compound **11b** in its ring-closed form.

## Supplementary figures of computational modeling

**Table 1.** Scores of the top five GOLD docking results (obtained with the ASP scoring function) for **11b** closed and **11b** open, as well as DSX rescoring results and reranking of the corresponding five poses.

| Rank<br>(GOLD/ASP) | Score<br>(GOLD/ASP) | Rescoring<br>(DSX) | Rescoring rank<br>(DSX) |
|--------------------|---------------------|--------------------|-------------------------|
| <b>11b closed</b>  |                     |                    |                         |
| 1                  | 108.33              | -212.65            | 2                       |
| <b>2</b>           | <b>105.79</b>       | <b>-241.23</b>     | <b>1</b>                |
| 3                  | 96.98               | -203.07            | 4                       |
| 4                  | 96.90               | -210.06            | 3                       |
| 5                  | 94.97               | -197.75            | 5                       |
| <b>11b open</b>    |                     |                    |                         |
| 1                  | 114.20              | -238.62            | 2                       |
| <b>2</b>           | <b>106.91</b>       | <b>-253.19</b>     | <b>1</b>                |
| 3                  | 100.23              | -209.64            | 3                       |
| 4                  | 98.80               | -205.64            | 4                       |
| 5                  | 98.74               | -199.97            | 5                       |

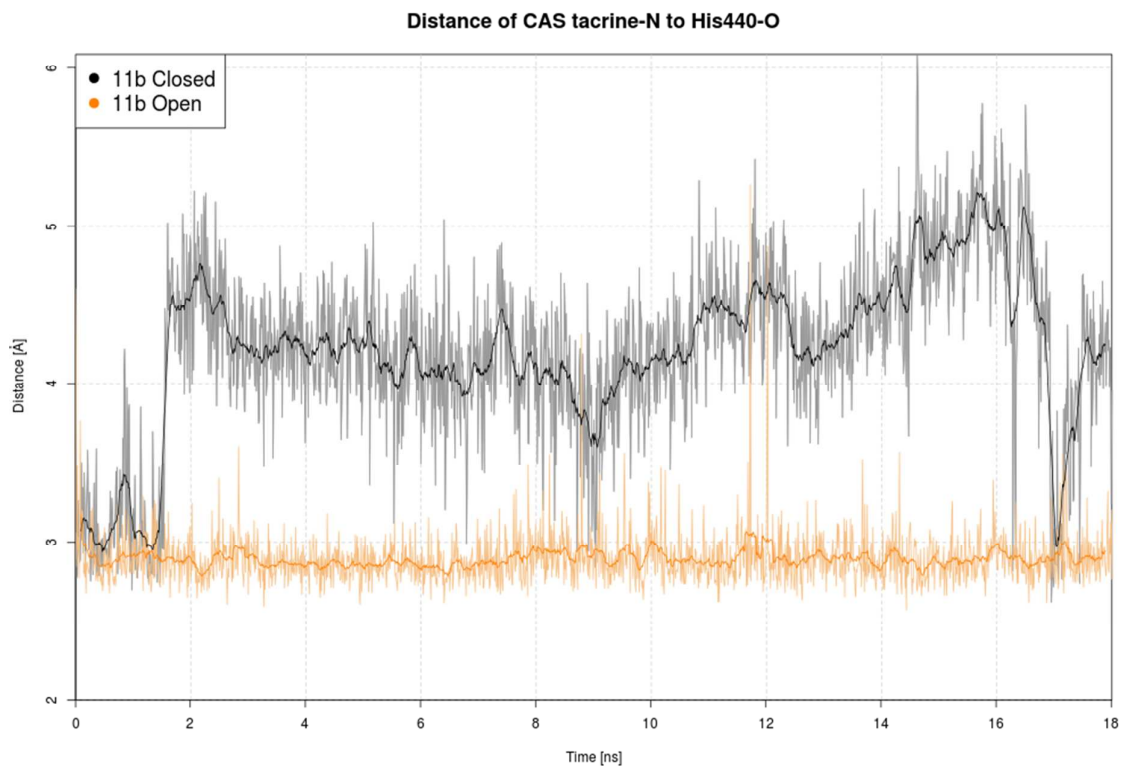

**Figure 13.** Distance of the tacrine aromatic nitrogen in the CAS to the His440 carbonyl oxygen of **11b** open and **11b** closed along the MD trajectories of 18 ns. Light colors depict the RMSD curve measured at each frame (10 ps), dark colors represent a moving average with a window size of 20 frames.
